# Supplementary material
Source: PubMed Central journal article supplement (PMC1380188)
Supplement: jamia_M1815_1.pdf [file jamia_M1815_1.pdf]

## Appendix I

### GLOSSARY OF TERMS

| <b>Term</b>                    | <b>Description</b>                                                                                                                                                                                                                                                                                                                                                                                                                           |
|--------------------------------|----------------------------------------------------------------------------------------------------------------------------------------------------------------------------------------------------------------------------------------------------------------------------------------------------------------------------------------------------------------------------------------------------------------------------------------------|
| Certification                  | The process to establish whether systems can meet the high-level functionalities and detailed messages/metrics required to support public health activities.                                                                                                                                                                                                                                                                                 |
| Common Alerting Protocol (CAP) | The Common Alerting Protocol (CAP) is an open, non-proprietary standard data interchange format that can be used to collect all types of hazard warnings and reports locally, regionally and nationally, for input into a wide range of information-management and warning dissemination systems.                                                                                                                                            |
| ebXML                          | ebXML (Electronic Business XML) is a project to use the Extensible Markup Language ( XML ) to standardize the secure exchange of business data.                                                                                                                                                                                                                                                                                              |
| Functional Requirement         | An expression of something a system must be able to do. Some are mandatory and others describe enhanced functionality. PHIN Functional Requirements describe functionality that is necessary to support activities in a particular area (e.g., laboratory systems must transmit result messages to public health systems)                                                                                                                    |
| Key Performance Measure        | A discrete testable technical or operational capability used to assess the effectiveness of the integration and exchange of data among the systems that support the PHIN Preparedness Requirements                                                                                                                                                                                                                                           |
| Messaging                      | Messaging is the electronic exchange of data between computerized information systems. See "Introduction to PHIN Health Level Seven (HL7) Implementation Guides" under Messaging on the PHIN website [10] at <a href="http://www.cdc.gov/phn/index.htm">http://www.cdc.gov/phn/index.htm</a> .                                                                                                                                               |
| Public Health Partners         | Public health departments and organizations at the state, local and national level, as well as ASTHO, NACCHO, CSTE, APHL, NAHDO, NAPHSIS, NAPHIT, etc.                                                                                                                                                                                                                                                                                       |
| Public Health Preparedness     | The state of being prepared as an organization involved in public health to respond to disasters and incidents of all kinds that affect the health or well being of the public at large or affect sectors of the population. All-hazard preparedness affects all sectors of American society - business, industry and nonprofit, state and local government, and the general public - for any emergency or disaster situation that may occur |
| Public Health Directory        | The CDC Public Health Directory (phindir) is an initiative that promotes the use of directory services technology as a means to support the electronic exchange of standards based profile information for people and organizations involved in public health. See "Public Health Directory (phindir)" on the PHIN website at <a href="http://www.cdc.gov/phn/phindir/index.htm">http://www.cdc.gov/phn/phindir/index.htm</a> .              |

|               |                                                                                                         |
|---------------|---------------------------------------------------------------------------------------------------------|
| Specification | A detailing of an industry standard to the point necessary for its use by operational system or systems |
| Standards     | Widely accepted industry-based benchmarks (e.g., HL7 v2.x PHIN Laboratory Result Messaging Standard)    |
